# Supplementary material for: Relationship between urinary sodium excretion and bone mineral density in pediatrics: population-based study from KNHANES V 2010–2011
Source: publisher site journal article supplement (doi:10.1515/jpem-2023-0520), 2024-05-16
Supplement: Supplementary file 1 [file j_jpem-2023-0520_suppl_001.docx]

Supplement 1. Mean ± standard deviations of urinary sodium creatinine ratio categorized by age and sex from KNHANES 2010-2011 data.

| **Age (years)** | **Boys**  **(N=1,084)** | **Girls**  **(N=934)** |
| --- | --- | --- |
| **10** | 0.189 ± 0.070 | 0.183 ± 0.058 |
| **11** | 0.164 ± 0.048 | 0.151 ± 0.046 |
| **12** | 0.137 ± 0.040 | 0.130 ± 0.035 |
| **13** | 0.110 ± 0.029 | 0.116 ± 0.031 |
| **14** | 0.096 ± 0.028 | 0.105 ± 0.026 |
| **15** | 0.090 ± 0.026 | 0.105 ± 0.028 |
| **16** | 0.086 ± 0.021 | 0.102 ± 0.025 |
| **17** | 0.085 ± 0.233 | 0.104 ± 0.029 |
| **18** | 0.085 ± 0.054 | 0.099 ± 0.021 |
| All values were presented as mean ± standard deviations. | | |
